# Supplementary material for: Influence of co-pathology on CSF and plasma synaptic markers SNAP25 and VAMP2 in Alzheimer’s disease and Parkinson’s disease
Source: Research Square preprint supplement (doi:10.21203/rs.3.rs-6113695/v1), 2025-05-06
Supplement: Supplementary file 1 [file afb9235674a205c61c520b9b.docx]

**Supplemental Material**

Assays for VAMP2 and SNAP25 determination in CSF and plasma were partially validated for several parameters as described in Andreasson *et al*, 2015 (doi: 10.3389/fneur.2015.00179).

*Supplemental table 1: Partial analytical validation of SNAP25 Simoa assay*

| **Parameters** | **Method** | **Acceptance criteria** | **Results** |
| --- | --- | --- | --- |
| **Measuring range** | LLOQ < > upper cal point (10 CAL points) | **NA** | 25 - 0,02 pg/mL |
| **Precision - repeatability** | Mean intra-run CV% per sample | **< 10%** | CSF: 2,3% and 3,7% Plasma: 2,3% and 4,5% |
| **intra-run %CV** | 5 independent test runs including CAL, |
|  | 2 remnant CSF (DF 120) and 2 plasma samples (DF 6), duplicates |
| **Precision - reproducibility** | inter-run CV% per sample | **< 20%** | CSF: 2,1% and 4,9% Plasma: 5,4% and 7,9% |
| **Inter-run %CV** | 5 independent test run including CAL, |
|  | 2 remnant CSF (DF 120) and 2 Plasma samples (DF 6), duplicates |
| **Accuracy** | %calculated/theoretical concentrations | **90-110%** | 96-105% |
| 5 independent test runs with CAL (duplicates) |
| **Analytical LLOQ** | Precision profile of extended CAL (12 datapoints) in 5 runs | **Inter-run %CV > 20%** | CAL based: 0,0054 pg/mL |
| **Minimal required dilution** | Dilution of 7 CSF/plasma from DF 1 up to DF 2187 and DF 20 resp. | **NA** | CSF: DF 9 |
| Plasma: DF 6 |
| **Parallelism** | Dilution of 7 CSF/plasma from DF 1 up to DF 2187 and DF 20 resp. | **80-120% (compared to MRD)** | CSF: Parallel up to DF 243 plasma: parallel up to DF 16 |
| **Serum – plasma correlation** | Correlation of 26 paired serum/plasma (DF 6, duplicates), Spearman rho | **R2 > 0.8** | R2 = 0.88 |
| **Spike-recovery** | (Spike control/Recovery) x 100% on 9 CSF/plasma samples spiked with 0,5 pg/mL - 0,25 pg/mL - 0,1 pg/mL | **80-120%** | CSF: High 98%, Mid 106%, Low 79% Plasma: High 88%, Mid 94%, Low 98% |
|  |
|  |
| **Dilution linearity** | Spike of 3 CSF/plasma samples above upper CAL (40 pg/mL) with dilution into measuring range | **Slope difference CAL vs spiked sample < 10%** | Slope difference 4,7% CSF and 6,0% plasma |  |
| **85-115% Linearity** | 85-115% CSF 87-125% plasma |  |

*Abbreviations: CAL= calibrator; DF= dilution factor; LLOQ= lower limit of quantification; %CV= variation coefficient; MRD= minimal required dilution*

*Supplemental table 2: Partial analytical validation of VAMP2 Simoa assay*

| **Analysed parameters** | **Method** | **Acceptance criteria** | **Results** |
| --- | --- | --- | --- |
| **Measuring range** | LLOQ < > upper CAL point (8 CAL points) | **NA** | 200-1 pg/mL |
| **Precision - repeatability** | Mean intra-run CV% per sample | **< 10%** | CSF: 3,0% and 6,7% Plasma: 4,5% and 5,0% |
| **intra-run %CV** | 5 independent test runs including CAL curve and |
|  | 2 remnant CSF (DF 16) and 2 plasma samples (DF 3), duplicates |
| **Precision - reproducibility** | inter-run CV% per sample | **< 20%** | CSF: 4,5% and 8,3% Plasma: 14% and 19% |
| **Inter-run %CV** | 5 independent test runs including CAL curve and |
|  | 2 remnant CSF (DF 16) and 2 plasma samples (DF 3), duplicates |
| **Accuracy** | %calculated/theoretical concentrations | **90-110%** | 93-109% |
| 5 independent test runs with CAL curve (duplicates, 5 days) |
| **Analytical LLOQ** | Precision profile of CAL (8 datapoints) in 5 runs | **Inter-run CV% exceeds 20%** | CAL based: 2,07 pg/mL |
| **Minimal required dilution** | Dilution of 7 CSF/plasma from DF 1 up to DF 36 and DF 4,5 resp. | **NA** | CSF: DF 12 |
| Plasma : DF 3 |
| **Parallelism** | Dilution of 7 CSF/plasma from DF 1 up to DF 36 and DF 4,5 resp. | **80-120% (compared to MRD)** | CSF: Parallel up to DF 24 plasma: parallel up to DF 4 |
| **Spike-recovery** | (Spike control/Recovery) x 100% on 9 CSF/plasma samples spiked with 49 pg/mL - 34 pg/mL - 18 pg/mL | **80-120%** | CSF: High 113%, Mid 108%, Low 110% Plasma: High 65%, Mid 57%, Low 52% |
|  |
|  |
| **Dilution linearity** | Spike of 4 CSF and 3plasma samples above upper CAL (1600 pg/mL) with dilution into measuring range | **85-115% Linearity** | 91-134% CSF 102-121% plasma, linearity starts at 200 pg/mLuntil LLOQ |  |
|  |

*Abbreviations: CAL= calibrator; DF= dilution factor; LLOQ= lower limit of quantification; %CV= variation coefficient; MRD= minimal required dilution*

The 80 paired CSF-plasma samples were run (and rerun for those with a high %CV on duplicate measurements) in four test runs for VAMP2 and four test runs for SNAP25. For VAMP-2, the average %CV of the clinical samples was 4.45% and 6.05% for CSF and plasma resp. For SNAP-25, the average %CV was 5.11% and 6.53% for CSF and plasma resp. These test runs were monitored with two run validation (RV, calibrator spiked in buffer in concentrations different from the calibrators) and two plasma QC (quality control) samples. Inter- and intra-run variability should be below 20% and a summary is shown in supplementary table 3.

*Supplemental Table 3:* Inter- and intra-run variability of the SNAP25 and VAMP2 runs during the study


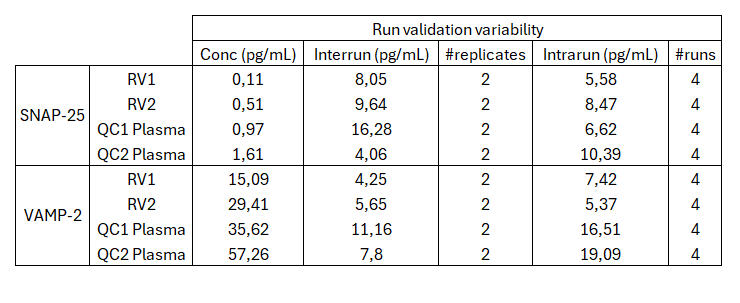


*Supplemental Table 4:* Receiver Operating Characteristic analysis

|  |  | **AUC** | | **Sensitivity %** | | **Specificity %** | | **PLR** |
| --- | --- | --- | --- | --- | --- | --- | --- | --- |
|  | **Best cut-off*** | **Value** | **95% CI** | **Value** | **95% CI** | **Value** | **95% CI** |  |
| **AD vs OND** | | | | | | | | |
| CSF SNAP25 | 125.3 | 0.831 | 0.744 – 0.918 | 87.3 | 78.2 - 92.9 | 71.8 | 56.2 - 83.5 | 3.09 |
| Plasma SNAP25 | 1.6 | 0.744 | 0.589 - 0.854 | 75.9 | 65.5 - 84.1 | 74.4 | 58.9 - 85.4 | 2.96 |
| CSF VAMP2 | 260.8 | 0.684 | 0.571 – 0.797 | 76.9 | 66.4 - 84.9 | 60.9 | 45.7 – 74.3 | 1.97 |
| Plasma VAMP2 | 19 | 0.507 | 0.388 – 0.626 | 97.4 | 91.1 – 99.5 | 12.8 | 5.6 – 26.7 | 1.12 |
| **PD vs OND** | | | | | | | | |
| CSF SNAP25 | 95.6 | 0.524 | 0.399 – 0.649 | 30.4 | 19.1 – 44.8 | 61.5 | 45.9 – 75.1 | 0.79 |
| Plasma SNAP25 | 0.73 | 0.620 | 0.499 – 0.741 | 0 | 0 – 7.6 | 92.3 | 79.7 – 97.4 | 0 |
| CSF VAMP2 | 166.7 | 0.525 | 0.400 – 0.649 | 20 | 10.9 – 33.8 | 70.7 | 55.5 – 82.4 | 0.68 |
| Plasma VAMP2 | 33.7 | 0.511 | 0.514 – 0.763 | 51.1 | 37.2 – 64.7 | 46.2 | 31.6 – 61.4 | 0.95 |

**Abbreviations**. AD: Alzheimer’s disease. AUC: area under the curve. CI: confidence interval. OND: other neurological diseases. PD: Parkinson’s disease. PLR: positive likelihood ratio. *Best cut-off values were calculated by maximizing the Youden index. SNAP-25: synaptosomal-associated protein 25 kDa. VAMP2: vesicle-associated membrane protein 2.

*Supplemental Figure 1:* ROC Analysis of synaptic markers


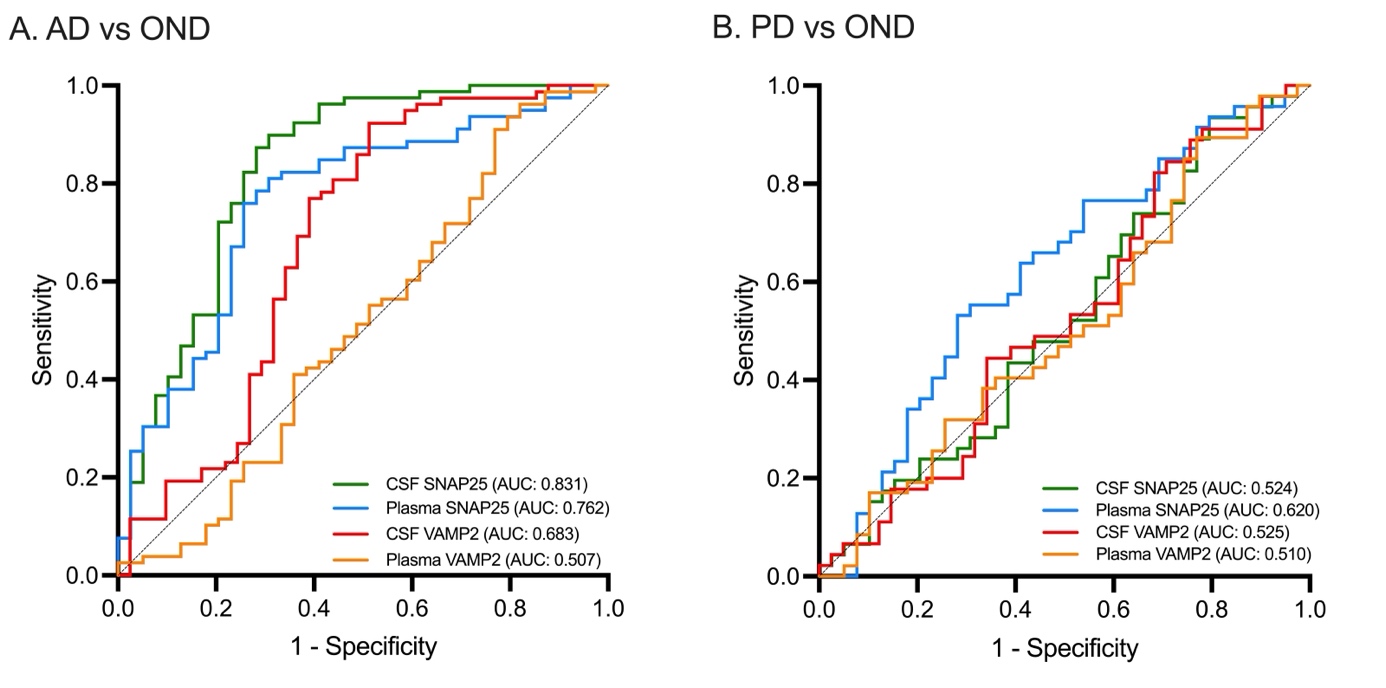


**Figure legend.** Panels show the results of ROC analyses in the comparisons between (A) AD and OND, and (B) PD and OND. AD: Alzheimer’s disease. OND: other neurological diseases. PD: Parkinson’s disease. ROC: receiver operating characteristic. SNAP-25: synaptosomal-associated protein 25 kDa. VAMP2: vesicle-associated membrane protein 2.

*Supplemental Figure 2:* Correlations betweenCSF and plasma SNAP25 and baseline MMSE in the study cohort.


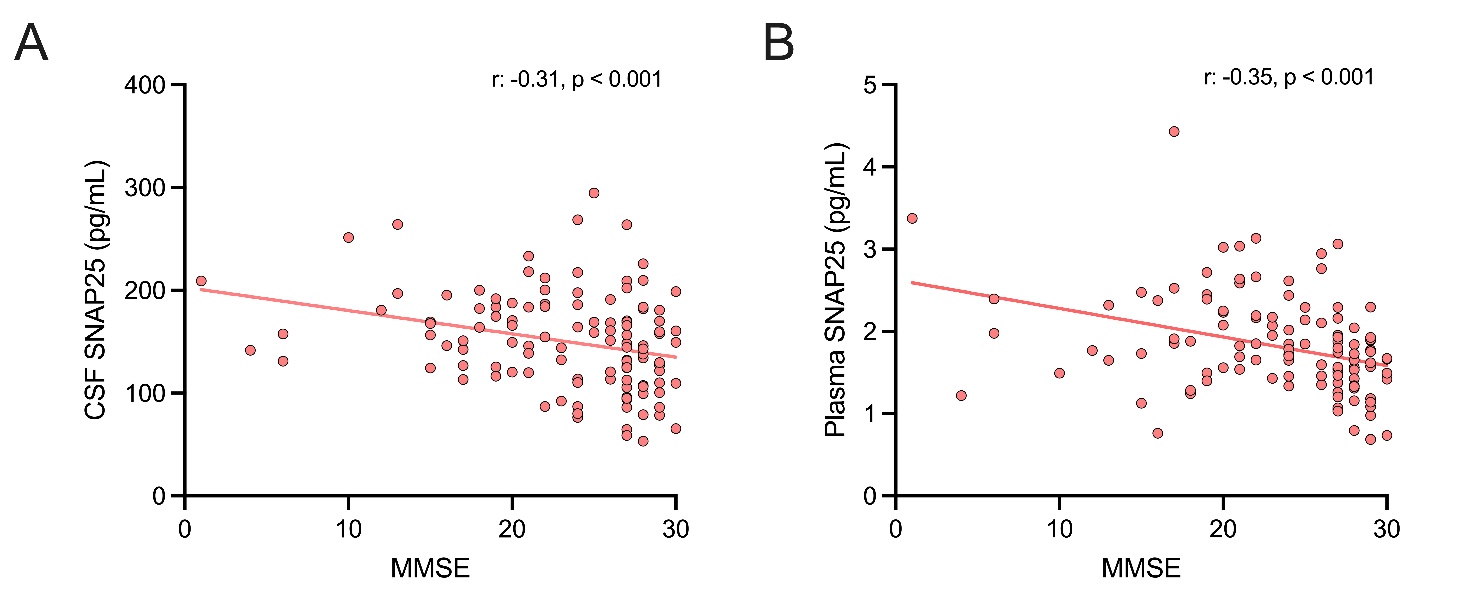


**Figure legend.** Panels show scatter plot of correlation between baseline MMSE and (A) CSF SNAP25 and (B) plasma SNAP25 in the study cohort. CSF: cerebrospinal fluid. MMSE: Mini Mental State Examination. SNAP-25: synaptosomal-associated protein 25 kDa.
